# Supplementary material
Source: publisher site journal article supplement (https://www.dovepress.com/article/505813)
Supplement: Supplementary file 1 [file get_supplementary_file.php]

Supplementary Table 1 Patient demographics and baseline characteristics before and after matching in the training cohort

| **Characteristics** | **Unmatched** | | | **Matched** | | |
| --- | --- | --- | --- | --- | --- | --- |
| **Non-Sepsis, N = 2,100** | **Sepsis, N = 917** | **p-value** | **Non-Sepsis, N = 917** | **Sepsis, N = 917** | ***p*-value** |
| **Age** | 52 (22, 69) | 26 (8, 53) | <0.001 | 26 (7, 55) | 26 (8, 53) | 0.726 |
| **Weight** | 56 (50, 61) | 52 (23, 59) | <0.001 | 54 (29, 59) | 52 (23, 59) | 0.277 |
| **Marital Status** |  |  | <0.001 |  |  | 0.852 |
| Single, divorced, and windowed | 757 (36%) | 489 (53%) |  | 485 (53%) | 489 (53%) |  |
| Married | 1,343 (64%) | 428 (47%) |  | 432 (47%) | 428 (47%) |  |
| **Hypertension** |  |  | <0.001 |  |  | 0.471 |
| No | 1,943 (93%) | 878 (96%) |  | 884 (96%) | 878 (96%) |  |
| Yes | 157 (7%) | 39 (4%) |  | 33 (4%) | 39 (4%) |  |
| **CHD** |  |  | 0.048 |  |  | 0.826 |
| No | 2,052 (98%) | 906 (99%) |  | 907 (99%) | 906 (99%) |  |
| Yes | 48 (2%) | 11 (1%) |  | 10 (1%) | 11 (1%) |  |
| **Diabetes** |  |  | 0.927 |  |  | 0.900 |
| No | 2,023 (96%) | 884 (96%) |  | 885 (97%) | 884 (96%) |  |
| Yes | 77 (4%) | 33 (4%) |  | 32 (3%) | 33 (4%) |  |
| **Smoking** |  |  | 0.003 |  |  | 0.316 |
| No | 1,956 (93%) | 880 (96%) |  | 888 (97%) | 880 (96%) |  |
| Yes | 144 (7%) | 37 (4%) |  | 29 (3%) | 37 (4%) |  |
| **Alcohol** |  |  | 0.096 |  |  | 0.512 |
| No | 2,028 (97%) | 896 (98%) |  | 900 (98%) | 896 (98%) |  |
| Yes | 72 (3%) | 21 (2%) |  | 17 (2%) | 21 (2%) |  |
| **Infection History** |  |  | 0.067 |  |  | 0.847 |
| No | 2,005 (95%) | 861 (94%) |  | 859 (94%) | 861 (94%) |  |
| Yes | 95 (5%) | 56 (6%) |  | 58 (6%) | 56 (6%) |  |
| **Hepatitis** |  |  | 0.004 |  |  | 0.810 |
| No | 2,054 (98%) | 880 (96%) |  | 882 (96%) | 880 (96%) |  |
| Yes | 46 (2%) | 37 (4%) |  | 35 (4%) | 37 (4%) |  |
| **Family Cancer History** |  |  | 0.009 |  |  | 0.223 |
| No | 2,092 (100%) | 906 (99%) |  | 911 (99%) | 906 (99%) |  |
| Yes | 8 (0%) | 11 (1%) |  | 6 (1%) | 11 (1%) |  |
| **Family History** |  |  | 0.001 |  |  | 0.295 |
| No | 2,048 (98%) | 874 (95%) |  | 883 (96%) | 874 (95%) |  |
| Yes | 52 (2%) | 43 (5%) |  | 34 (4%) | 43 (5%) |  |
| **Gender** |  |  | 0.346 |  |  | 0.848 |
| Male | 1,244 (59%) | 560 (61%) |  | 556 (61%) | 560 (61%) |  |
| Female | 856 (41%) | 357 (39%) |  | 361 (39%) | 357 (39%) |  |
| **ABO** |  |  | 0.429 |  |  | 0.947 |
| A | 521 (25%) | 242 (26%) |  | 236 (26%) | 242 (26%) |  |
| AB | 126 (6%) | 53 (6%) |  | 58 (6%) | 53 (6%) |  |
| B | 544 (26%) | 253 (28%) |  | 249 (27%) | 253 (28%) |  |
| O | 909 (43%) | 369 (40%) |  | 374 (41%) | 369 (40%) |  |

Abbreviations: CHD, coronary heart disease.

| **Supplementary Table 2 Univariate logistic regression analysis for sepsis in the training cohort** | | | | | |
| --- | --- | --- | --- | --- | --- |
| **Characteristic** | **OverallN** | **Non-Sepsis N** | **OR** | **95% CI** | ***p*-value** |
| **Age** | 1,834 | 917 | 1 | 1.00, 1.00 | 0.959 |
| **Gender** |  |  |  |  |  |
| Male | 1,116 | 560 | — | — |  |
| Female | 718 | 357 | 0.98 | 0.81, 1.18 | 0.848 |
| **ABO** |  |  |  |  |  |
| A | 478 | 242 | — | — |  |
| AB | 111 | 53 | 0.89 | 0.59, 1.35 | 0.585 |
| B | 502 | 253 | 0.99 | 0.77, 1.27 | 0.943 |
| O | 743 | 369 | 0.96 | 0.76, 1.21 | 0.742 |
| **Marital Status** |  |  |  |  |  |
| Single, divorced, and windowed | 974 | 489 | — | — |  |
| Married | 860 | 428 | 0.98 | 0.82, 1.18 | 0.852 |
| **Hypertension** |  |  |  |  |  |
| No | 1,762 | 878 | — | — |  |
| Yes | 72 | 39 | 1.19 | 0.74, 1.92 | 0.471 |
| **CHD** |  |  |  |  |  |
| No | 1,813 | 906 | — | — |  |
| Yes | 21 | 11 | 1.1 | 0.46, 2.66 | 0.826 |
| **Diabetes** |  |  |  |  |  |
| No | 1,769 | 884 | — | — |  |
| Yes | 65 | 33 | 1.03 | 0.63, 1.70 | 0.9 |
| **Smoking** |  |  |  |  |  |
| No | 1,768 | 880 | — | — |  |
| Yes | 66 | 37 | 1.29 | 0.79, 2.13 | 0.317 |
| **Alcohol** |  |  |  |  |  |
| No | 1,796 | 896 | — | — |  |
| Yes | 38 | 21 | 1.24 | 0.65, 2.40 | 0.513 |
| **Infection History** |  |  |  |  |  |
| No | 1,720 | 861 | — | — |  |
| Yes | 114 | 56 | 0.96 | 0.66, 1.41 | 0.847 |
| **Hepatitis** |  |  |  |  |  |
| No | 1,762 | 880 | — | — |  |
| Yes | 72 | 37 | 1.06 | 0.66, 1.70 | 0.81 |
| **Family Cancer History** |  |  |  |  |  |
| No | 1,817 | 906 | — | — |  |
| Yes | 17 | 11 | 1.84 | 0.70, 5.37 | 0.23 |
| **Family History** |  |  |  |  |  |
| No | 1,757 | 874 | — | — |  |
| Yes | 77 | 43 | 1.28 | 0.81, 2.03 | 0.296 |
| **Fecal OB** |  |  |  |  |  |
| Negative | 1,437 | 734 | — | — |  |
| Positive | 397 | 183 | 0.82 | 0.66, 1.02 | 0.079 |
| **Urine TP** |  |  |  |  |  |
| Negative | 1,499 | 737 | — | — |  |
| Positive | 335 | 180 | 1.2 | 0.95, 1.52 | 0.131 |
| **Urine URO** |  |  |  |  |  |
| Negative | 1,371 | 734 | — | — |  |
| Positive | 463 | 183 | 0.57 | 0.46, 0.70 | <0.001 |
| **Urine BIL** |  |  |  |  |  |
| Negative | 1,399 | 735 | — | — |  |
| Positive | 435 | 182 | 0.65 | 0.52, 0.81 | <0.001 |
| **Urine KET** |  |  |  |  |  |
| Negative | 1,565 | 764 | — | — |  |
| Positive | 269 | 153 | 1.38 | 1.07, 1.80 | 0.015 |
| **Urine Glu** |  |  |  |  |  |
| Negative | 1,662 | 827 | — | — |  |
| Positive | 172 | 90 | 1.11 | 0.81, 1.52 | 0.522 |
| **Urine OB** |  |  |  |  |  |
| Negative | 1,413 | 684 | — | — |  |
| Positive | 421 | 233 | 1.32 | 1.06, 1.64 | 0.013 |
| Weight | 1,834 | 917 | 1 | 0.99, 1.00 | 0.327 |
| Temperature | 1,834 | 917 | 1.33 | 1.19, 1.50 | <0.001 |
| PulseRate | 1,834 | 917 | 1.01 | 1.00, 1.01 | <0.001 |
| HR | 1,834 | 917 | 1.01 | 1.00, 1.01 | <0.001 |
| RR | 1,834 | 917 | 1 |  | 0.506 |
| DBP | 1,834 | 917 | 0.98 | 0.97, 0.99 | <0.001 |
| SBP | 1,834 | 917 | 0.99 | 0.98, 0.99 | <0.001 |
| WBC | 1,834 | 917 | 1 | 1.00, 1.00 | <0.001 |
| RBC | 1,834 | 917 | 0.77 | 0.71, 0.85 | <0.001 |
| MCV | 1,834 | 917 | 1 | 0.99, 1.01 | 0.502 |
| MCHC | 1,834 | 917 | 1 | 1.00, 1.01 | 0.049 |
| MCH | 1,834 | 917 | 1.01 | 0.99, 1.04 | 0.184 |
| RDW | 1,834 | 917 | 1.01 | 0.98, 1.03 | 0.604 |
| Lymph | 1,834 | 917 | 0.99 | 0.99, 1.00 | <0.001 |
| Mono | 1,834 | 917 | 1 | 0.99, 1.00 | 0.109 |
| Neut | 1,834 | 917 | 0.99 | 0.99, 1.00 | <0.001 |
| Hct | 1,834 | 917 | 0.98 | 0.97, 0.99 | <0.001 |
| Eos | 1,834 | 917 | 0.87 | 0.79, 0.94 | 0.001 |
| Baso | 1,834 | 917 | 0.81 | 0.68, 0.91 | 0.003 |
| Hb | 1,834 | 917 | 0.99 | 0.99, 1.00 | <0.001 |
| PLT | 1,834 | 917 | 1 | 1.00, 1.00 | 0.029 |
| MPV | 1,834 | 917 | 1.01 | 0.95, 1.07 | 0.712 |
| PDW | 1,834 | 917 | 0.99 | 0.97, 1.02 | 0.507 |
| PCT1 | 1,834 | 917 | 0.7 | 0.40, 1.23 | 0.217 |
| ALT | 1,834 | 917 | 1 | 1.00, 1.00 | 0.322 |
| AST | 1,834 | 917 | 1 | 1.00, 1.00 | 0.375 |
| GGT | 1,834 | 917 | 1 | 1.00, 1.00 | 0.394 |
| TBIL | 1,834 | 917 | 1 | 1.00, 1.01 | 0.207 |
| DBIL | 1,834 | 917 | 1.01 | 1.00, 1.01 | 0.083 |
| IBIL | 1,834 | 917 | 0.99 | 0.98, 1.00 | 0.081 |
| ALB | 1,834 | 917 | 0.95 | 0.94, 0.96 | <0.001 |
| GLO | 1,834 | 917 | 0.99 | 0.98, 1.00 | 0.181 |
| TP | 1,834 | 917 | 0.97 | 0.96, 0.98 | <0.001 |
| A.G | 1,834 | 917 | 0.79 | 0.65, 0.97 | 0.023 |
| PA | 1,834 | 917 | 1 | 1.00, 1.00 | 0.009 |
| TBA | 1,834 | 917 | 1.01 | 1.00, 1.01 | 0.001 |
| CREA | 1,834 | 917 | 1 | 1.00, 1.00 | 0.361 |
| UREA | 1,834 | 917 | 1.04 | 1.01, 1.08 | 0.013 |
| UA | 1,834 | 917 | 1 | 1.00, 1.00 | 0.007 |
| TC | 1,834 | 917 | 0.93 | 0.86, 1.00 | 0.062 |
| TG | 1,834 | 917 | 0.95 | 0.88, 1.03 | 0.225 |
| HDL.C | 1,834 | 917 | 0.8 | 0.63, 1.00 | 0.053 |
| LDL.C | 1,834 | 917 | 0.91 | 0.82, 1.01 | 0.066 |
| LPa | 1,834 | 917 | 1 | 1.00, 1.00 | 0.008 |
| apoAI | 1,834 | 917 | 0.59 | 0.44, 0.79 | <0.001 |
| apoB | 1,834 | 917 | 0.61 | 0.41, 0.89 | 0.01 |
| Ca | 1,834 | 917 | 0.27 | 0.16, 0.43 | <0.001 |
| K. | 1,834 | 917 | 0.91 | 0.78, 1.05 | 0.205 |
| Na. | 1,834 | 917 | 0.95 | 0.93, 0.98 | <0.001 |
| Cl. | 1,834 | 917 | 0.98 | 0.96, 0.99 | 0.015 |
| LDH | 1,834 | 917 | 1 | 1.00, 1.00 | 0.171 |
| ALP | 1,834 | 917 | 1 | 1.00, 1.00 | 0.676 |
| ChE | 1,834 | 917 | 0.86 | 0.82, 0.90 | <0.001 |
| HCY | 1,834 | 917 | 0.99 | 0.98, 1.00 | 0.004 |
| Cys.C | 1,834 | 917 | 0.96 | 0.80, 1.15 | 0.638 |
| CO2 | 1,834 | 917 | 0.98 | 0.96, 1.01 | 0.253 |
| AG | 1,834 | 917 | 1 | 0.97, 1.02 | 0.762 |
| Glu | 1,834 | 917 | 1.01 | 0.98, 1.05 | 0.44 |
| TT | 1,834 | 917 | 0.93 | 0.90, 0.96 | <0.001 |
| PT | 1,834 | 917 | 1 |  | 0.518 |
| PTR | 1,834 | 917 | 1.2 | 0.92, 1.61 | 0.197 |
| APTT | 1,834 | 917 | 1 | 1.00, 1.01 | 0.426 |
| APTTR | 1,834 | 917 | 1.5 | 1.07, 2.13 | 0.02 |
| PT.INR | 1,834 | 917 | 1.13 | 0.88, 1.46 | 0.349 |
| Fbg | 1,834 | 917 | 1.18 | 1.10, 1.26 | <0.001 |
| CRP | 1,834 | 917 | 1.01 | 1.01, 1.01 | <0.001 |
| NRBC | 1,834 | 917 | 0.92 | 0.84, 1.00 | 0.062 |
| α.HBDH | 1,834 | 917 | 1 | 1.00, 1.00 | 0.835 |
| AFU | 1,834 | 917 | 0.99 | 0.98, 1.00 | 0.211 |
| RET | 1,834 | 917 | 1.02 | 0.99, 1.10 | 0.419 |
| RET. | 1,834 | 917 | 1 | 1.00, 1.01 | 0.59 |
| IRF | 1,834 | 917 | 1 | 1.00, 1.01 | 0.237 |
| PCT | 1,834 | 917 | 1.13 | 1.08, 1.18 | <0.001 |

Abbreviations: HR, heart rate; RR, respiratory rate; DBP, diastolic blood pressure; SBP, systolic blood pressure; WBC, white blood cell count; RBC, red blood cell count; MCV, mean corpuscular volume; MCHC, mean corpuscular hemoglobin concentration; MCH, mean corpuscular hemoglobin; RDW, red cell distribution width; Lymph, lymphocyte count; Mono, monocyte count; Neut, neutrophil count; Hct, hematocrit; Eos, eosinophil count; Baso, basophil count; Hb, hemoglobin; PLT, platelet count; MPV, mean platelet volume; PDW, platelet distribution width; PCT1, plateletcrit; ALT, alanine transaminase; AST, aspartate transaminase; GGT, gamma-glutamyl transferase; TBIL, total bilirubin; DBIL, direct bilirubin; IBIL, indirect bilirubin; ALB, albumin; GLO, globulin; TP, total protein; A.G, albumin-to-globulin ratio; PA, prealbumin; TBA, total bile acid; CREA, creatinine; UREA, urea; UA, uric acid; TC, total cholesterol; TG, triglycerides; HDL.C, high-density lipoprotein cholesterol; LDL.C, low-density lipoprotein cholesterol; LPa, lipoprotein (a); apoAI, apolipoprotein A-I; apoB, apolipoprotein B; Ca, calcium; K, potassium; Na, sodium; Cl, chloride; LDH, lactate dehydrogenase; ALP, alkaline phosphatase; ChE, cholinesterase; HCY, homocysteine; Cys.C, cystatin C; CO2, carbon dioxide; AG, anion gap; Glu, glucose; TT, thrombin time; PT, prothrombin time; PTR, prothrombin ratio; APTT, activated partial thromboplastin time; APTTR, activated partial thromboplastin time ratio; PT.INR, prothrombin international normalized ratio; Fbg, fibrinogen; CRP, C-reactive protein; NRBC, nucleated red blood cells; α.HBDH, alpha-hydroxybutyrate dehydrogenase; AFU, alpha-L-fucosidase; RET, reticulocyte count; IRF, immature reticulocyte fraction; PCT, procalcitonin; CHD, coronary heart disease; Urine OB, urine occult blood; Urine Glu, urine glucose; Urine TP, urine protein; Urine URO, urine urobilinogen; Urine BIL, urine bilirubin; Urine KET, urine ketones.

**Supplementary Table 3 Multicollinearity Assessment Among Independent Variables**

| **Term** | **VIF** | **VIF CI low** | **VIF CI high** | **SE factor** | **Tolerance** | **Tolerance CI low** | **Tolerance CI high** |
| --- | --- | --- | --- | --- | --- | --- | --- |
| SBP | 1.024 | 1.003 | 1.176 | 1.011 | 0.977 | 0.850 | 0.997 |
| PCT | 1.041 | 1.01 | 1.136 | 1.020 | 0.961 | 0.880 | 0.988 |
| Lymph | 1.032 | 1.007 | 1.145 | 1.016 | 0.969 | 0.873 | 0.993 |
| RBC | 1.032 | 1.007 | 1.145 | 1.016 | 0.969 | 0.873 | 0.993 |
| Neut | 1.028 | 1.005 | 1.154 | 1.014 | 0.972 | 0.867 | 0.994 |
| TBA | 1.044 | 1.014 | 1.135 | 1.022 | 0.958 | 0.880 | 0.986 |
| TT | 1.049 | 1.018 | 1.136 | 1.024 | 0.953 | 0.880 | 0.982 |
| CRP | 1.059 | 1.025 | 1.140 | 1.029 | 0.944 | 0.877 | 0.975 |

Abbreviations: variance inflation factor (VIF); confidence interval (CI); standard error (SE); systolic blood pressure (SBP); red blood cells (RBC), lymphocytes (Lymph); neutrophils (Neut); total bile acid (TBA); thrombin time (TT); C-reactive protein (CRP); procalcitonin (PCT).

**Supplementary Table 4 Comparison of validation cohort results of the machine learning models**

| Model | Accuracy | Sensitivity | Specificity | Recall | F1score |
| --- | --- | --- | --- | --- | --- |
| RF | 0.758 | 0.655 | 0.714 | 0.655 | 0.675 |
| XGB | 0.673 | 0.608 | 0.738 | 0.608 | 0.650 |
| SVM | 0.696 | 0.524 | 0.669 | 0.524 | 0.633 |
| NNET | 0.570 | 0.345 | 0.797 | 0.345 | 0.466 |
| KNN | 0.565 | 0.560 | 0.571 | 0.560 | 0.563 |
| LOGI | 0.631 | 0.607 | 0.655 | 0.607 | 0.622 |
| DCtree | 0.601 | 0.369 | 0.833 | 0.369 | 0.481 |

Abbreviations: RF, Random Forest; XGB, eXtreme Gradient Boosting; SVM, Support Vector Machine; NNET, Neural Network; KNN, K-Nearest Neighbors; LOGI, Logistic Regression; DCtree, Decision Tree.

**Supplementary Table 5 Comparison of sensitivity analysis results of no imputation on the comprehensive impact of machine learning models in the training cohort**

| Model | Accuracy | Sensitivity | Specificity | Recall | F1score |
| --- | --- | --- | --- | --- | --- |
| RF | 0.747 | 0.718 | 0.699 | 0.718 | 0.720 |
| XGB | 0.674 | 0.706 | 0.701 | 0.706 | 0.670 |
| SVM | 0.675 | 0.484 | 0.732 | 0.484 | 0.686 |
| NNET | 0.653 | 0.635 | 0.739 | 0.635 | 0.598 |
| KNN | 0.588 | 0.525 | 0.648 | 0.525 | 0.567 |
| LOGI | 0.643 | 0.628 | 0.660 | 0.628 | 0.647 |
| DCtree | 0.646 | 0.543 | 0.718 | 0.543 | 0.630 |

Abbreviations: RF, Random Forest; XGB, eXtreme Gradient Boosting; SVM, Support Vector Machine; NNET, Neural Network; KNN, K-Nearest Neighbors; LOGI, Logistic Regression; DCtree, Decision Tree.

**Supplementary Table 6 Effect of Standardized Variables on Sepsis Risk: Odds Ratios from Segmented Logistic Regression Analysis**

| Characteristic | OR per SD | 95% CI | *p*-value |
| --- | --- | --- | --- |
| CRP (< 24.068 mg/L) | 0.85 | 0.74, 0.98 | 0.029 |
| CRP (≥ 24.068 mg/L) | 3.22 | 2.58, 4.03 | <0.001 |
| Lymph (< 5) | 0.68 | 0.61, 0.77 | <0.001 |
| Lymph (≥ 5) | 0.88 | 0.72, 1.04 | 0.16 |
| Neut (< 5) | 0.76 | 0.67, 0.86 | <0.001 |
| Neut (≥ 5) | 0.77 | 0.63, 0.91 | 0.006 |
| PCT (< 0.324 μg/L) | 1.01 | 0.89, 1.15 | 0.84 |
| PCT (≥ 0.324 μg/L) | 4.91 | 2.77, 8.71 | <0.001 |
| RBC (< 2.48 x10^6/μL) | 1.05 | 0.90, 1.21 | 0.53 |
| RBC (≥ 2.48 x10^6/μL) | 0.68 | 0.60, 0.77 | <0.001 |
| SBP (< 128.63 mmHg) | 0.68 | 0.61, 0.75 | <0.001 |
| SBP (≥ 128.63 mmHg) | 0.93 | 0.74, 1.16 | 0.52 |
| TBA (< 6.01 μmol/L) | 1.03 | 0.90, 1.18 | 0.65 |
| TBA (≥ 6.01 μmol/L) | 1.37 | 1.18, 1.59 | <0.001 |
| TT (< 17 s) | 0.83 | 0.71, 0.96 | 0.015 |
| TT (≥ 17 s) | 0.94 | 0.81, 1.08 | 0.38 |

Abbreviations: OR = Odds Ratio, SD = Standard Deviation, CI = Confidence Interval; C-reactive protein (CRP); lymphocytes (Lymph); neutrophils (Neut); procalcitonin (PCT); red blood cells (RBC); systolic blood pressure (SBP); total bile acid (TBA); thrombin time (TT).

**Supplementary Figure 1 Interaction analysis between predictors.**

**
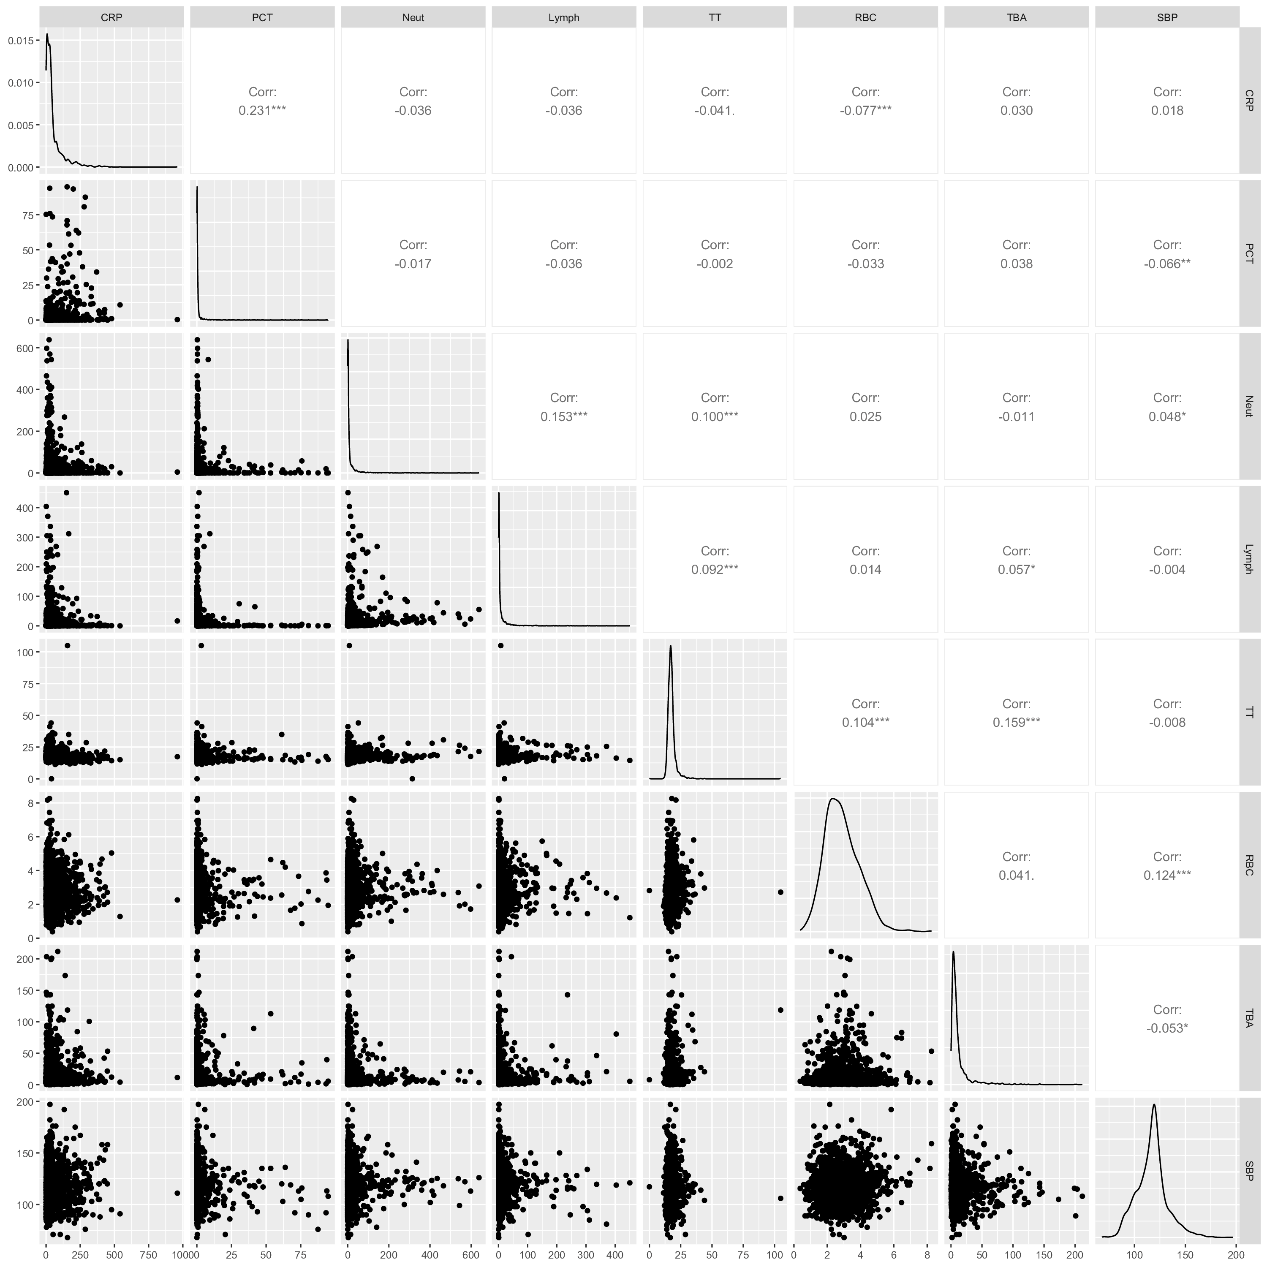
**

This figure presents scatter plots, density distributions, and correlation coefficients for the predictive variables (CRP, PCT, Neut, Lymph, TT, RBC, TBA, and SBP). Positive and negative correlations between variables are visualized, providing preliminary insights into their interactions.

Abbreviations: systolic blood pressure (SBP); red blood cells (RBC), lymphocytes (Lymph); neutrophils (Neut); total bile acid (TBA); thrombin time (TT); C-reactive protein (CRP); procalcitonin (PCT). * *P*<0.05; ** *P*<0.01; ****P*<0.001
